# Supplementary material for: RNANetMotif: Identifying sequence-structure RNA network motifs in RNA-protein binding sites
Source: PubMed Central journal article supplement (PMC9275694; doi:10.1371/journal.pcbi.1010293), 2022-07-12

k=3

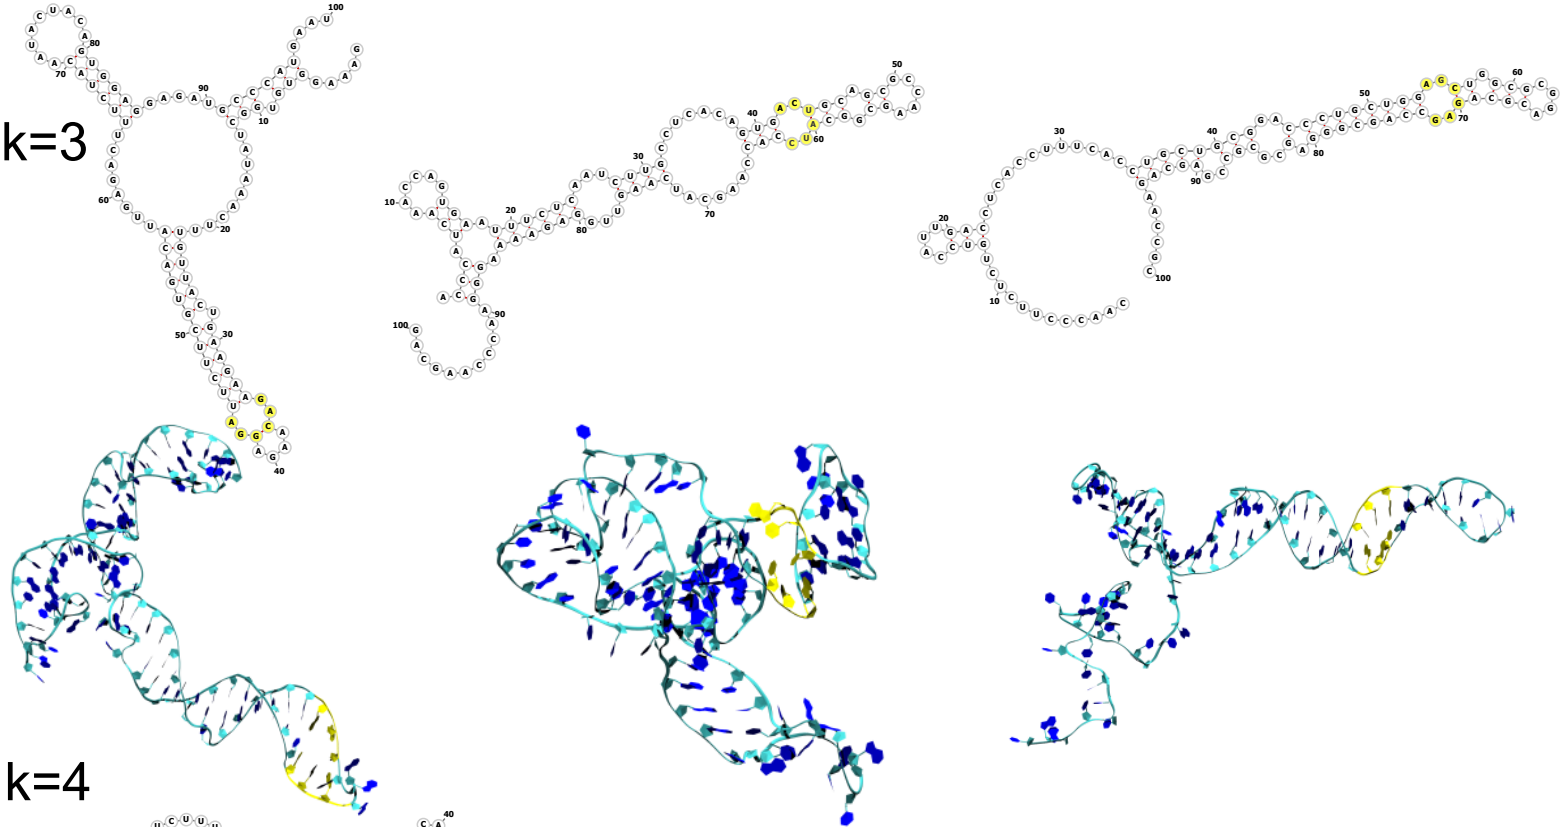

k=4

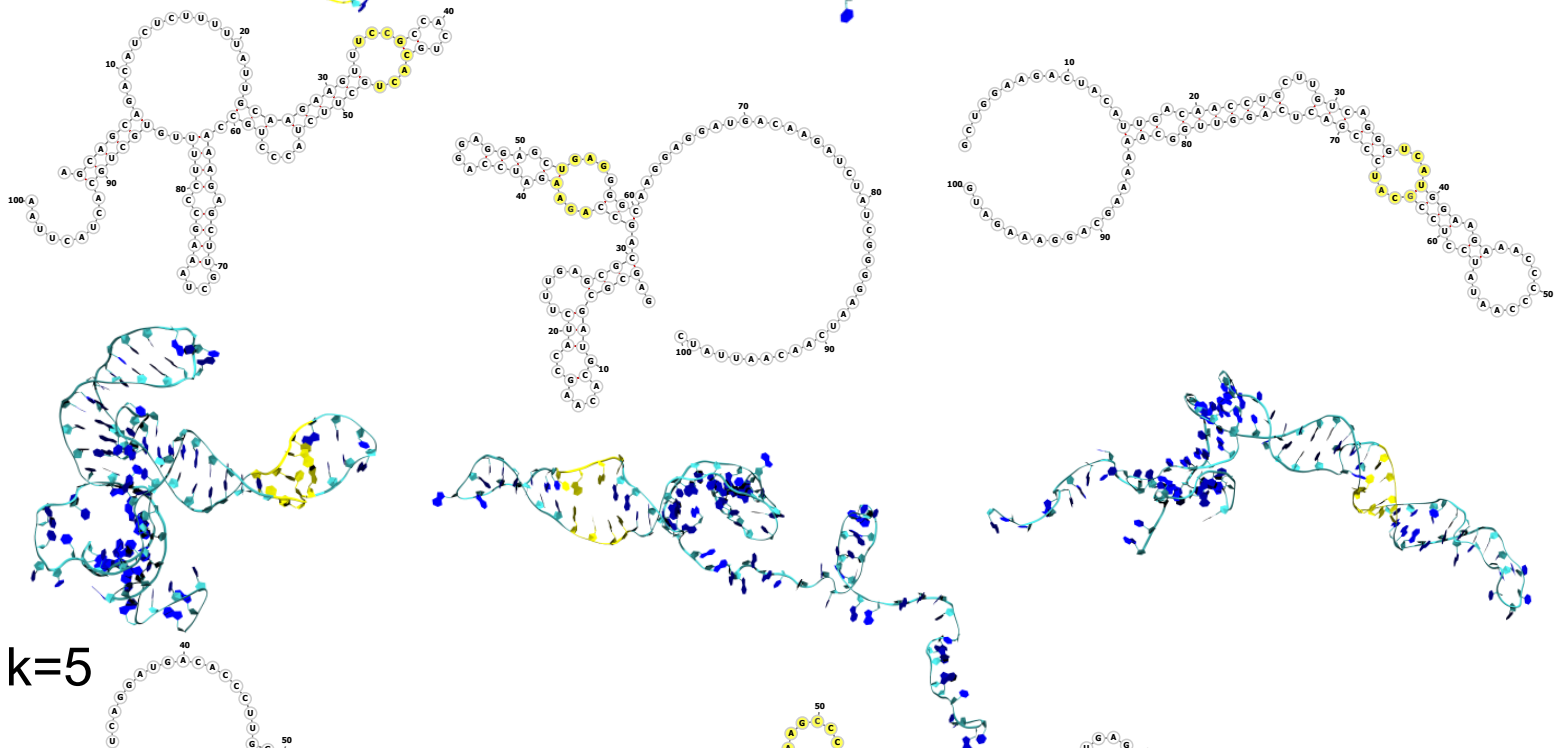

k=5

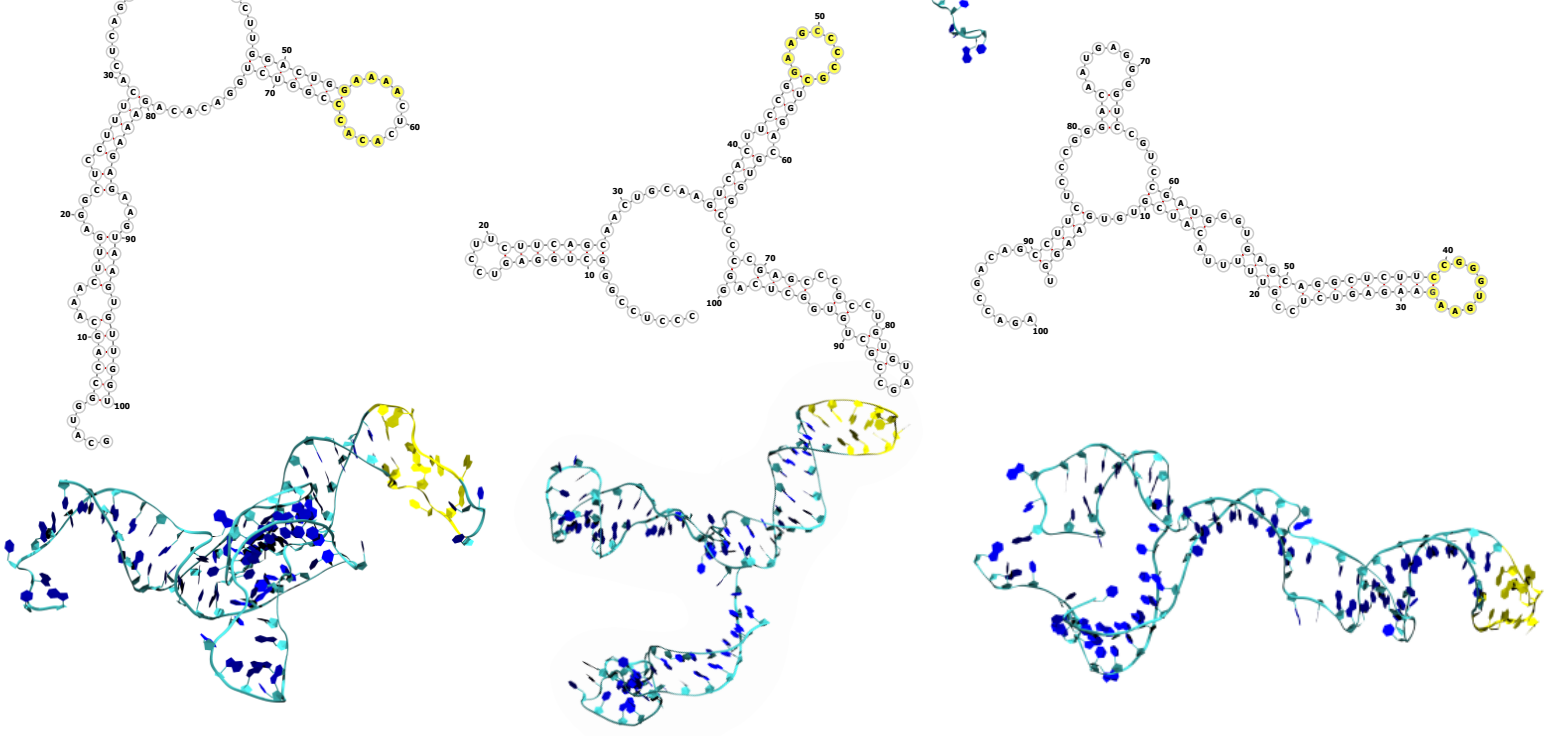

Supplement: pcbi.1010293.s007.pdf [file pcbi.1010293.s007.pdf]
