# Supplementary material for: RNANetMotif: Identifying sequence-structure RNA network motifs in RNA-protein binding sites
Source: PubMed Central journal article supplement (PMC9275694; doi:10.1371/journal.pcbi.1010293), 2022-07-12

G3BP1\_HepG2

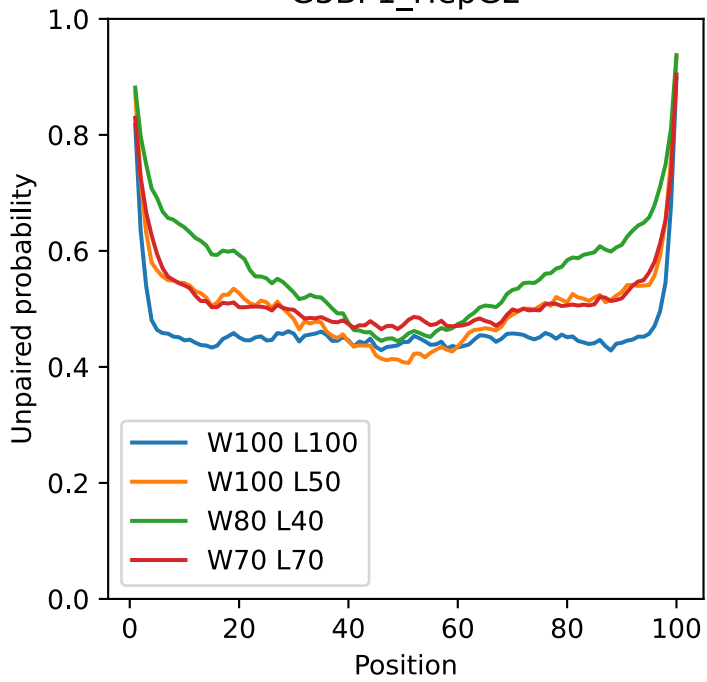

IGF2BP1\_K562

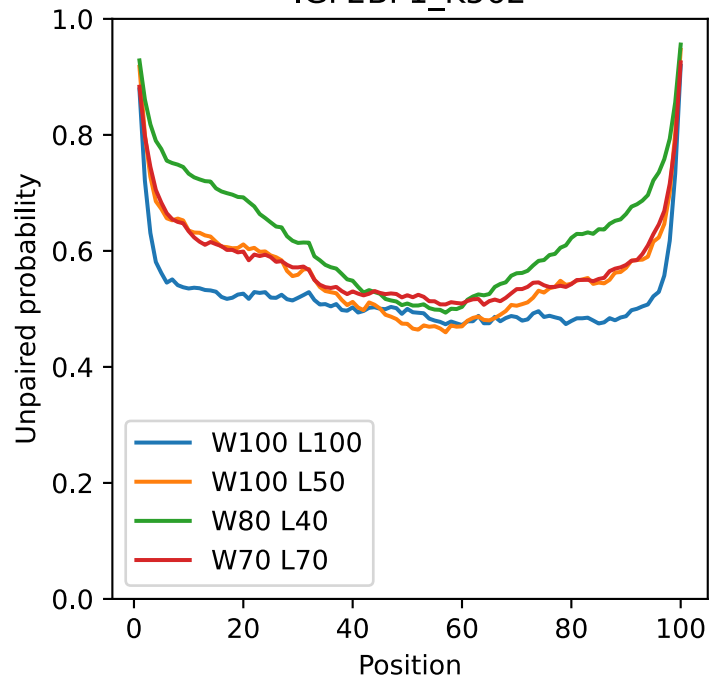

LIN28B\_K562

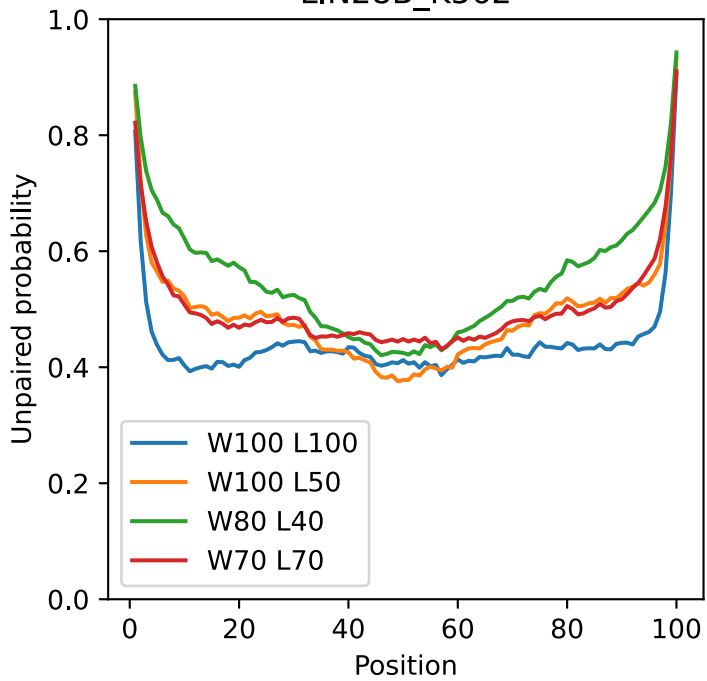

PUM2\_K562

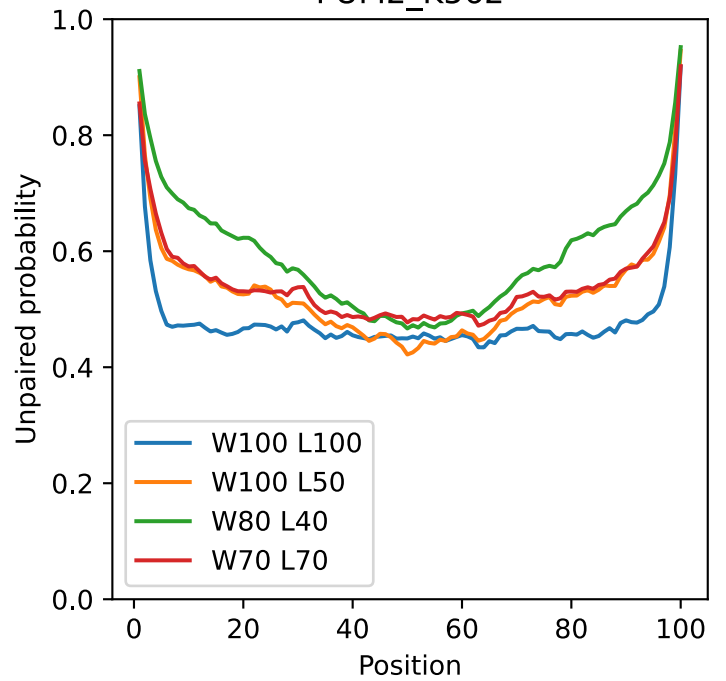

Supplement: pcbi.1010293.s014.pdf [file pcbi.1010293.s014.pdf]
